# Supplementary material
Source: publisher site journal article supplement (https://www.dovepress.com/article/401687)

## **Supplementary materials**

### **Assessing the health economic outcomes from commercially insured relapsing multiple sclerosis patients who switched from other disease-modifying therapies to teriflunomide, in the United States**

**Lita Araujo<sup>1</sup>, Srikanth Kyatham<sup>2\*</sup>, Kristen G Bzdek<sup>3\*</sup>, Keiko Higuchi<sup>4</sup>, Nupur Greene<sup>5</sup>**

<sup>1</sup>Health Economics & Value Assessment, Neurology and Immunology, Sanofi, 450 Water Street, Cambridge, MA, USA [ORCID: 0000-0002-6863-9340]

<sup>2</sup>*Axtria Inc, Berkeley Heights, NJ, USA (\*at the time of the study)*

<sup>3</sup>Medical affairs, Sanofi, 450 Water Street, Cambridge, MA, USA (*\*at the time of the study*)

<sup>4</sup>Global & US Health Economics & Value Assessment, Neurology and Immunology, Sanofi, 450 Water Street, Cambridge, MA, USA

<sup>5</sup>Health Economics & Value Assessment, Neurology and Immunology, Sanofi, 450 Water Street, Cambridge, MA, USA

**Table S1 Healthcare resource utilization and costs for ambulatory aids and prescriptions (1-year pre- vs 1-year post-index period)**

|                                                  | 1 Year<br>Pre Index | 1 Year<br>Post Index | <i>p</i> -Value |
|--------------------------------------------------|---------------------|----------------------|-----------------|
| Healthcare resource utilization                  |                     |                      |                 |
| All-cause services (event rate/100 person-years) |                     |                      |                 |
| Durable medical equipment                        | 0.001               | 0.001                | <0.001          |
| Prescriptions (pharmacy + medical <sup>a</sup> ) | 0.303               | 0.342                | —               |
| MS-specific (event rate/100 person-years)        |                     |                      |                 |
| Durable medical equipment                        | 0.001               | 0.001                | 0.648           |
| Prescriptions (pharmacy + medical <sup>a</sup> ) | 0.092               | 0.113                | —               |
| Healthcare costs                                 |                     |                      |                 |
| All-cause services, \$PPPY                       |                     |                      |                 |
| Durable medical equipment                        | 69.1                | 35.8                 | 0.001           |
| Prescriptions (pharmacy + medical <sup>a</sup> ) | 46,384              | 62,830               | —               |
| MS-specific services, \$PPPY                     |                     |                      |                 |
| Durable medical equipment                        | 68.5                | 34.7                 | 0.346           |
| Prescriptions (pharmacy + medical <sup>a</sup> ) | 40,017              | 53,143               | —               |

**Notes:** The first claim of teriflunomide has been included for 1 year pre index date but not for

1 year post index date. <sup>a</sup>Inpatient and outpatient medical claims. *P*-values calculated using Wilcoxon rank-sum test.

**Abbreviations:** MS, multiple sclerosis; PPPY, per person, per year.

**Table S2 Patient age at MS diagnosis and teriflunomide initiation, and time since MS diagnosis for patients initiated on teriflunomide before and after December 31, 2015**

|                                | Before December 31,<br>2015 | After January 1, 2016 |
|--------------------------------|-----------------------------|-----------------------|
|                                | n=956                       | n=1060                |
| Age at MS diagnosis, years     |                             |                       |
| Mean $\pm$ SD                  | 48.2 $\pm$ 9.5              | 46.6 $\pm$ 8.9        |
| Median (IQR)                   | 49.0 (42.0, 54.0)           | 47.0 (41.0, 53.0)     |
| Age at initiation, years       |                             |                       |
| Mean $\pm$ SD                  | 52.2 $\pm$ 9.6              | 51.6 $\pm$ 9.1        |
| Median (IQR)                   | 53.0 (46.0, 59.0)           | 52.0 (45.0, 58.0)     |
| Time since MS diagnosis, years |                             |                       |
| Mean $\pm$ SD                  | 4.21 $\pm$ 2.4              | 5.07 $\pm$ 3.1        |
| Median (IQR)                   | 3.96 (2.12, 6.13)           | 4.71 (2.26, 7.47)     |

**Abbreviations:** IQR, interquartile range; MS, multiple sclerosis; SD, standard deviation.

**Figure S1 Study design. DMT, disease-modifying therapy.**

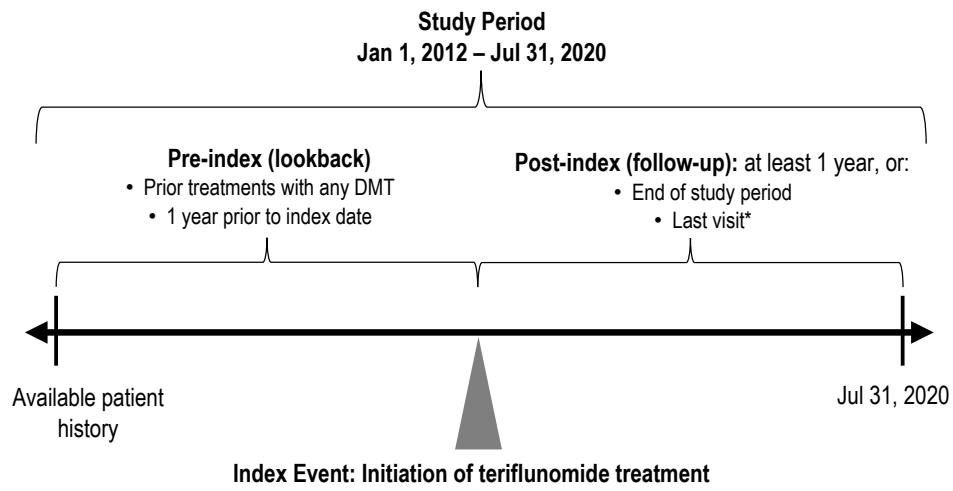

\* Last visit = last physical encounter

**Figure S2 DMTs used prior to switching to teriflunomide (1-year pre-index period), (n=1741). (A) Patient using different DMTs prior to switching to teriflunomide. (B) Mean duration of time (days) on different DMT prior to switching to teriflunomide. Error bars show standard deviation. DMT, disease-modifying therapy.**

**(A)**

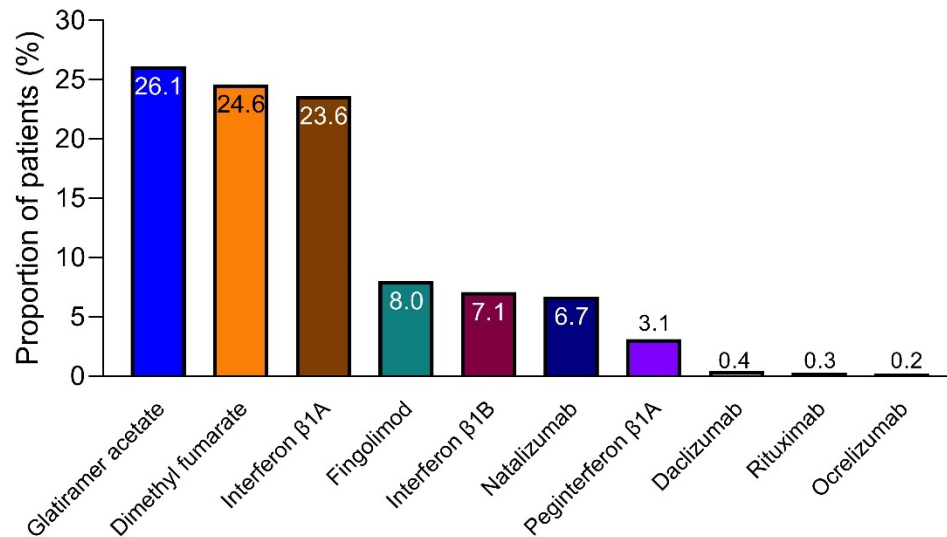

**(B)**

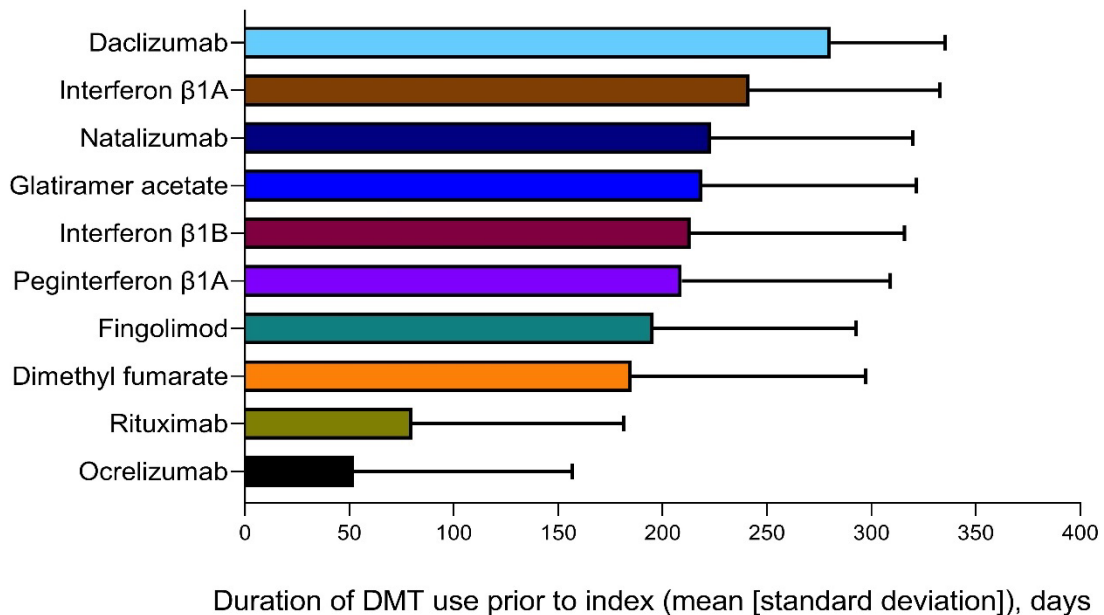

Supplement: Supplementary file 1 [file get_supplementary_file.php]
